# Supplementary material
Source: PubMed Central journal article supplement (PMC2699236)
Supplement: blood-2008-10-187138_1.pdf [file blood-2008-10-187138_1.pdf]

**Percent Injected Dose per Gram Tissue**  
*(Time Post-Injection)*

|                 | 5 min      |            | 2 h        |            | 6 h        |            | 24 h       |            | 48 h       |            | 72 h      |            | 168 h       |            |
|-----------------|------------|------------|------------|------------|------------|------------|------------|------------|------------|------------|-----------|------------|-------------|------------|
| Tissue          | 22-20      | e-mab      | 22-20     | e-mab      | 22-20       | e-mab      |
| <b>Liver</b>    | 5.0 ± 1.7  | 5.8 ± 2.0  | 5.4 ± 1.8  | 5.8 ± 2.1  | 5.6 ± 0.5  | 5.1 ± 0.5  | 2.2 ± 0.3  | 3.0 ± 0.3  | 1.7 ± 0.1  | 2.9 ± 0.1  | 0.9 ± 0.4 | 2.1 ± 0.4  | 0.2 ± 0.1   | 1.4 ± 0.5  |
| <b>Spleen</b>   | 5.2 ± 1.3  | 6.1 ± 1.4  | 7.2 ± 1.1  | 6.7 ± 1.2  | 5.7 ± 0.6  | 6.1 ± 0.9  | 3.0 ± 0.2  | 4.2 ± 0.5  | 2.4 ± 0.3  | 4.1 ± 0.4  | 1.1 ± 0.4 | 2.7 ± 0.4  | 0.3 ± 0.1   | 1.4 ± 0.3  |
| <b>Kidney</b>   | 5.6 ± 2.4  | 6.2 ± 2.5  | 8.2 ± 1.4  | 8.3 ± 1.5  | 6.3 ± 1.6  | 6.1 ± 1.4  | 3.1 ± 0.6  | 3.8 ± 0.4  | 2.3 ± 0.3  | 3.7 ± 0.5  | 1.3 ± 0.7 | 2.8 ± 1.0  | 0.2 ± 0.04  | 0.9 ± 0.2  |
| <b>Lungs</b>    | 7.0 ± 2.6  | 6.3 ± 2.0  | 8.4 ± 2.5  | 7.5 ± 1.9  | 7.3 ± 1.7  | 7.3 ± 1.6  | 4.9 ± 0.1  | 6.2 ± 0.1  | 3.9 ± 0.4  | 6.4 ± 0.7  | 1.9 ± 0.7 | 4.5 ± 0.7  | 0.2 ± 0.1   | 1.5 ± 0.2  |
| <b>Blood</b>    | 43.3 ± 5.6 | 38.5 ± 7.3 | 45.3 ± 4.8 | 39.7 ± 5.7 | 32.3 ± 3.5 | 30.2 ± 2.9 | 16.1 ± 0.5 | 18.9 ± 1.4 | 11.0 ± 1.8 | 17.3 ± 2.2 | 5.9 ± 2.5 | 13.9 ± 2.6 | 0.4 ± 0.1   | 3.6 ± 1.0  |
| <b>Stomach</b>  | 0.5 ± 0.2  | 1.1 ± 0.5  | 2.9 ± 0.5  | 3.5 ± 0.7  | 4.7 ± 1.4  | 3.2 ± 1.0  | 1.9 ± 0.2  | 1.2 ± 0.2  | 1.0 ± 0.1  | 0.9 ± 0.1  | 0.7 ± 0.2 | 1.0 ± 0.1  | 0.2 ± 0.1   | 1.0 ± 0.5  |
| <b>Sm. Int.</b> | 0.7 ± 0.3  | 0.8 ± 0.3  | 2.1 ± 0.5  | 2.6 ± 0.6  | 1.8 ± 0.3  | 2.2 ± 0.4  | 0.9 ± 0.1  | 1.3 ± 0.2  | 0.6 ± 0.1  | 1.1 ± 0.1  | 0.4 ± 0.2 | 0.9 ± 0.2  | 0.01 ± 0.02 | 0.3 ± 0.1  |
| <b>Lg. Int.</b> | 0.4 ± 0.2  | 0.5 ± 0.2  | 1.3 ± 0.3  | 1.5 ± 0.4  | 1.3 ± 0.3  | 1.8 ± 0.3  | 0.7 ± 0.1  | 1.0 ± 0.1  | 0.5 ± 0.02 | 0.9 ± 0.02 | 0.3 ± 0.1 | 0.7 ± 0.2  | 0.1 ± 0.02  | 0.2 ± 0.04 |
