# Supplementary material
Source: PubMed Central journal article supplement (PMC2699236)
Supplement: blood-2008-10-187138_2.pdf [file blood-2008-10-187138_2.pdf]

**Percent Injected Dose per Gram Tissue**  
(Time Post-Injection)

|                 | 5 min        |              | 2 h          |              | 6 h          |              | 24 h         |              | 48 h         |              | 72 h         |              | 168 h        |              |
|-----------------|--------------|--------------|--------------|--------------|--------------|--------------|--------------|--------------|--------------|--------------|--------------|--------------|--------------|--------------|
| <b>Tissue</b>   | <b>20-22</b> | <b>v-mab</b> |
| <b>Liver</b>    | 9.5 ± 0.8    | 8.6 ± 0.6    | 6.2 ± 0.3    | 6.3 ± 0.2    | 5.0 ± 0.4    | 5.3 ± 0.6    | 2.5 ± 0.1    | 3.6 ± 0.2    | 1.9 ± 0.4    | 3.5 ± 0.5    | 1.7 ± 0.2    | 3.2 ± 0.3    | 0.6 ± 0.4    | 2.4 ± 1.7    |
| <b>Spleen</b>   | 8.4 ± 0.6    | 7.8 ± 0.1    | 7.5 ± 0.7    | 6.3 ± 0.8    | 5.7 ± 0.6    | 5.3 ± 0.6    | 2.5 ± 0.3    | 3.6 ± 0.5    | 1.8 ± 0.4    | 3.4 ± 0.4    | 1.8 ± 0.1    | 3.7 ± 0.2    | 0.6 ± 0.3    | 1.6 ± 1.0    |
| <b>Kidney</b>   | 10.3 ± 0.8   | 10.2 ± 0.7   | 7.6 ± 1.3    | 7.7 ± 1.3    | 6.8 ± 0.3    | 7.4 ± 0.5    | 3.4 ± 0.3    | 4.9 ± 0.4    | 2.5 ± 0.6    | 4.7 ± 0.7    | 2.1 ± 0.4    | 4.2 ± 0.7    | 0.4 ± 0.2    | 1.0 ± 0.8    |
| <b>Lungs</b>    | 11.7 ± 1.8   | 11.3 ± 1.9   | 9.5 ± 0.5    | 9.8 ± 0.6    | 7.8 ± 0.5    | 8.4 ± 0.6    | 4.5 ± 0.2    | 6.8 ± 0.3    | 3.5 ± 0.9    | 6.8 ± 1.2    | 3.3 ± 0.6    | 6.8 ± 0.9    | 0.5 ± 0.3    | 1.7 ± 1.2    |
| <b>Blood</b>    | 61.0 ± 2.5   | 61.5 ± 2.4   | 43.5 ± 6.4   | 45.7 ± 6.9   | 29.5 ± 3.8   | 33.4 ± 4.5   | 15.9 ± 1.3   | 24.1 ± 2.2   | 11.7 ± 2.5   | 23.6 ± 3.4   | 10.9 ± 0.4   | 23.4 ± 1.4   | 1.2 ± 1.2    | 4.3 ± 4.7    |
| <b>Stomach</b>  | 1.4 ± 0.4    | 1.4 ± 0.4    | 3.2 ± 0.5    | 1.4 ± 0.2    | 5.0 ± 1.2    | 1.9 ± 0.2    | 1.1 ± 0.1    | 0.9 ± 0.2    | 0.7 ± 0.2    | 0.8 ± 0.2    | 0.7 ± 0.2    | 0.9 ± 0.2    | 0.5 ± 0.3    | 1.5 ± 1.0    |
| <b>Sm. Int.</b> | 1.4 ± 0.1    | 1.4 ± 0.1    | 1.9 ± 0.1    | 2.1 ± 0.1    | 1.8 ± 0.1    | 2.0 ± 0.1    | 0.9 ± 0.1    | 1.3 ± 0.1    | 0.6 ± 0.1    | 1.2 ± 0.2    | 0.6 ± 0.1    | 1.2 ± 0.1    | 0.1 ± 0.1    | 0.3 ± 0.2    |
| <b>Lg. Int.</b> | 0.8 ± 0.2    | 0.8 ± 0.2    | 1.2 ± 0.1    | 1.3 ± 0.1    | 1.4 ± 0.2    | 1.7 ± 0.4    | 0.6 ± 0.1    | 0.9 ± 0.1    | 0.4 ± 0.1    | 0.9 ± 0.1    | 0.4 ± 0.1    | 0.9 ± 0.1    | 0.1 ± 0.1    | 0.3 ± 0.2    |
